# Supplementary material for: Electrically switched asymmetric interfaces for liquid manipulation
Source: Royal Society of Chemistry journal article supplement (doi:10.1039/d4mh01227e), 2024-10-29
Supplement: d4mh01227e1.pdf [file d4mh01227e1.pdf]

## Electronic Supplementary Information (ESI)

### **Electrically Switched Asymmetric Interface for Liquid Manipulation**

Ke Li,<sup>a</sup> Yuliang Li,<sup>a</sup> Qiuya Zhang,<sup>a</sup> Honghao Li,<sup>a</sup> Wentao Zou,<sup>a</sup> Lu Li,<sup>a</sup> Yan Li,<sup>a</sup> Xiaofang Zhang,<sup>b</sup>

Dongliang Tian<sup>\*a</sup> and Lei Jiang<sup>a,c</sup>

a. Key Laboratory of Bio-Inspired Smart Interfacial Science and Technology, School of Chemistry, Beihang University, Beijing 100191, P. R. China

b. School of Mathematics and Physics, University of Science & Technology Beijing, Beijing 100083, P. R. China

c. Technical Institute of Physics and Chemistry, Chinese Academy of Sciences, Beijing 100190, PR China

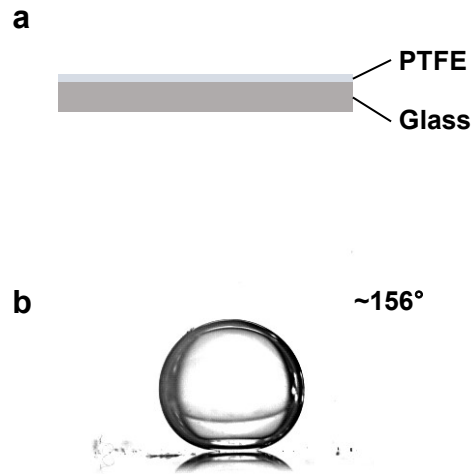

**Fig. S1** (a) Superhydrophobic substrate composed of PTFE on glass surface. (b) The contact angle of liquid droplet on the substrate surface is  $\sim 156^\circ$  in oil, indicating the prepared PTFE/glass substrate is superhydrophobic.

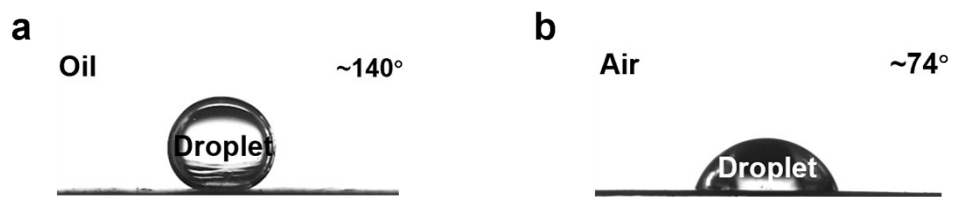

**Fig. S2** The contact angle of liquid droplet (2  $\mu\text{L}$ ) on flat electrode surface in oil (a) is  $\sim 140^\circ$  and in air (b) is  $\sim 74^\circ$ .

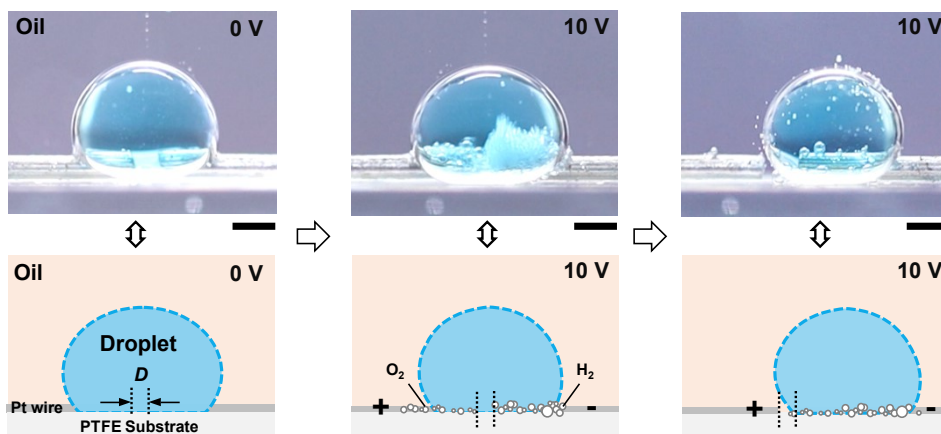

**Fig. S3** Electric field induced unidirectional liquid droplet motion on the wire electrode surface. Scale bars are 1 mm.

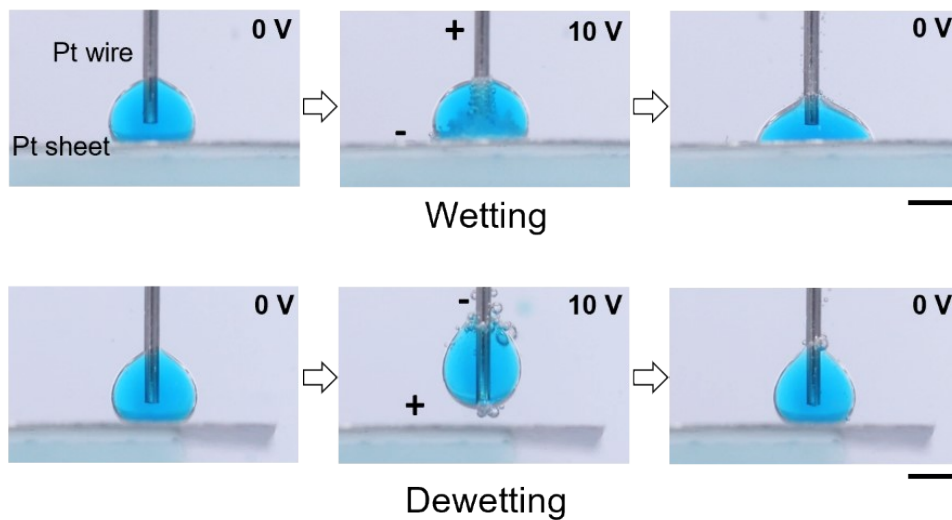

**Fig. S4** Liquid droplet wetting and dewetting behavior on electrode surface by changing the electrode shape and direction. Scale bars are 3 mm.

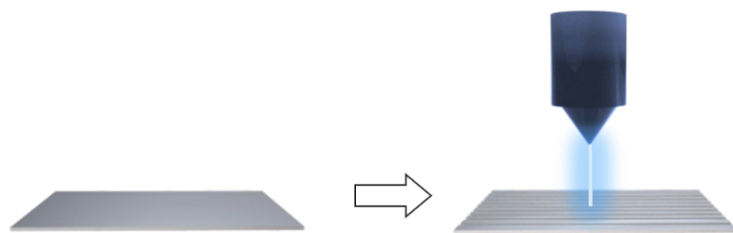

**Fig. S5** Schematic preparation of groove-microstructured Pt electrode by laser etching.

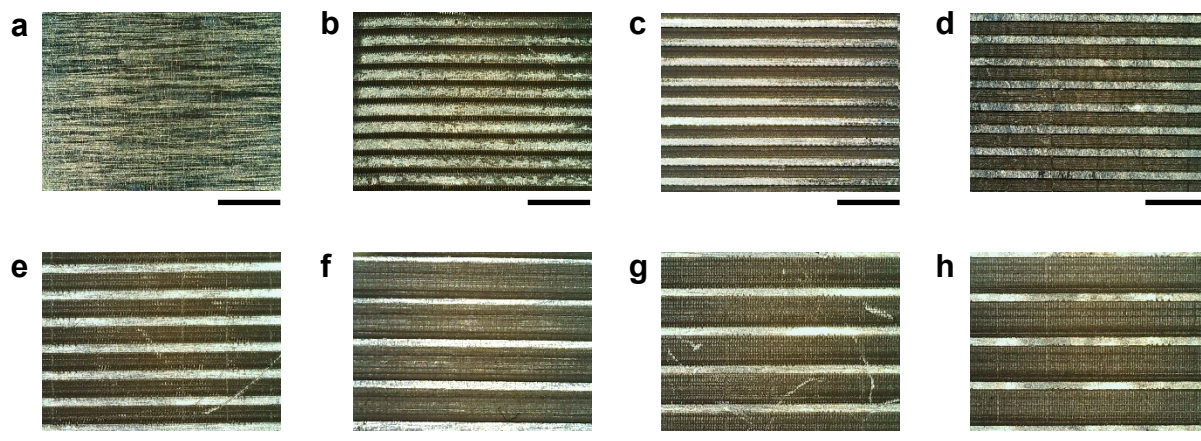

**Fig. S6** Microscopic surface morphology of microstructured electrode surface with different groove width. (a)  $w=0\ \mu\text{m}$ , (b)  $w=50\ \mu\text{m}$ , (c)  $w=100\ \mu\text{m}$ , (d)  $w=200\ \mu\text{m}$ , (e)  $w=300\ \mu\text{m}$ , (f)  $w=400\ \mu\text{m}$ , (g)  $w=500\ \mu\text{m}$  and (h)  $w=600\ \mu\text{m}$ . Scale bars are 1 mm.

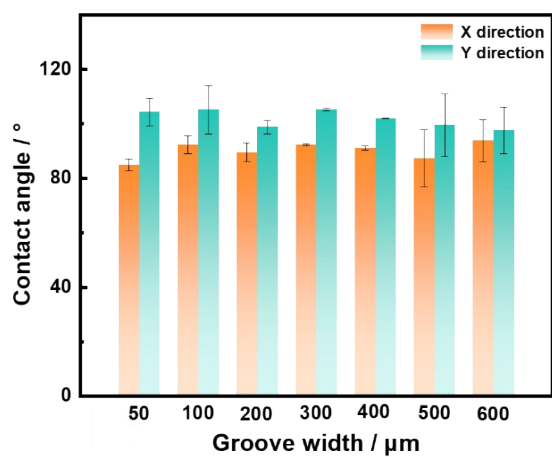

**Fig. S7** Contact angle of groove-microstructured electrode surface in air along X and Y direction changes with different groove width.



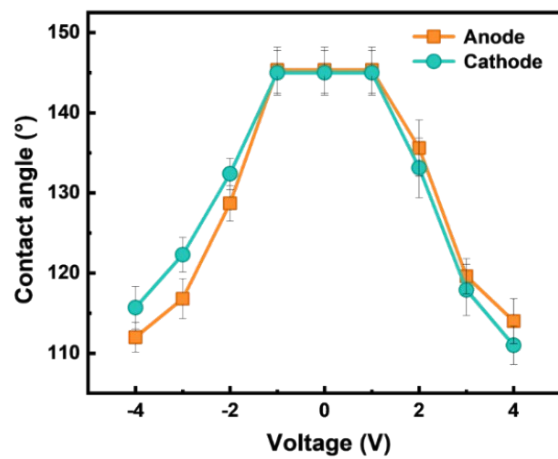

**Figure S8.** Contact angle of liquid droplet on flat electrode surface changes with the applied voltage of -4~4 V.

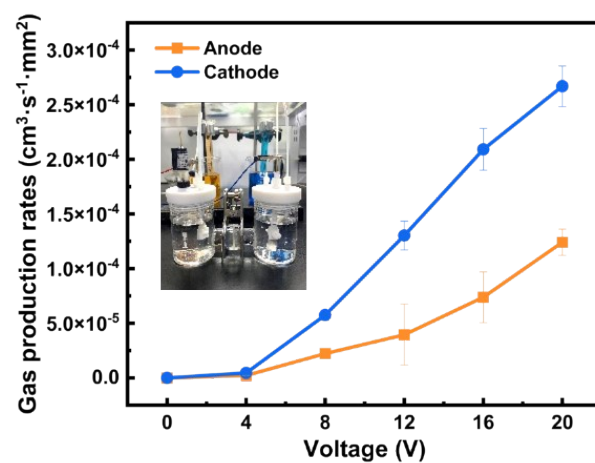

**Fig. S9** Comparison of cathode and anode gas generation rate on flat electrode surface using the drainage gas collection method.

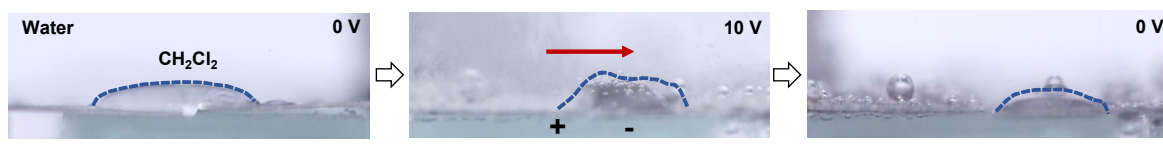

**Fig. S10** Electric field induced directional dichloromethane transport on electrode surface in water. Scale bars are 1 mm.

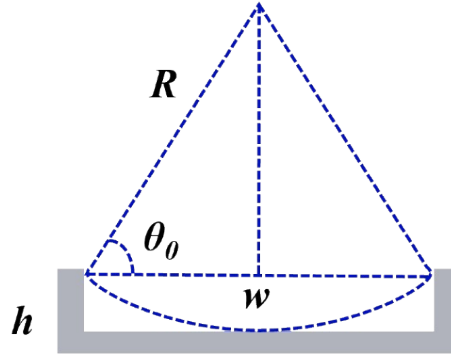

**Fig. S11** Schematic liquid droplet wetting on the groove-microstructured electrode surface. For the groove-microstructured electrode surface with groove microstructure depth ( $h$ ), intrinsic contact angle ( $\theta_0$ ), radius of liquid droplet ( $R$ ) and the groove width ( $w$ ), based on the relationship:

$$R = \frac{h}{1 - \sin(\pi - \theta_0)} = \frac{h}{1 - \sin\theta_0} \#(1)$$

$$\frac{w}{2R} = \cos(\pi - \theta_0) = -\cos\theta_0 \#(2)$$

When the liquid droplet just contacts with bottom of the groove-microstructured electrode, the critical width of groove ( $w_c$ ) can be calculated as:

$$w_c = \frac{2h\cos\theta_0}{\sin\theta_0 - 1} \#(3)$$

For the groove-microstructured electrode with intrinsic CA of  $\sim 140^\circ$ , and  $h \sim 80 \mu\text{m}$ , the critical width of groove ( $w_c$ ) by calculating is  $345 \mu\text{m}$ , *i.e.*, when  $w_c = 345 \mu\text{m}$ , liquid droplet can contact with and just wet the bottom of groove-microstructured electrode.

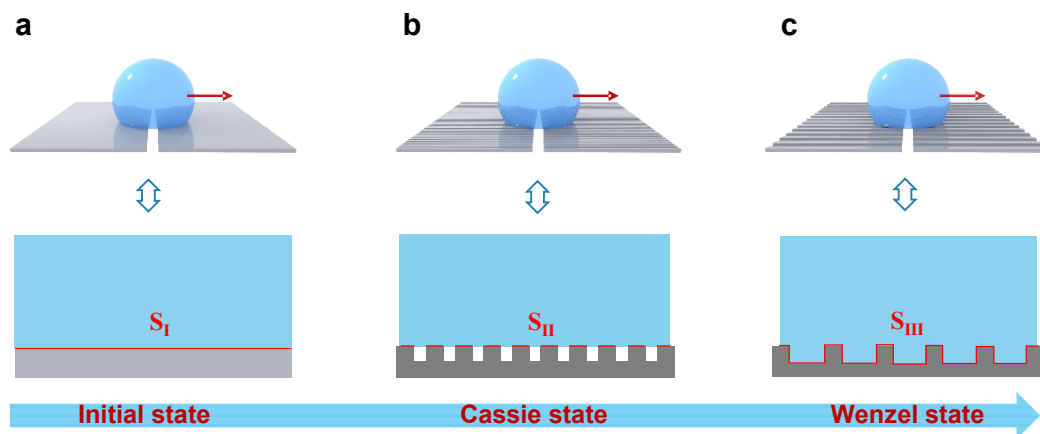

**Fig. S12** Liquid droplet wetting states on electrode surface with different groove width. (a) Liquid droplet wetting in the initial state on flat electrode surface. (b) Liquid droplet wetting in the Cassie state on groove-microstructured electrode surface with  $w=0\sim 300\ \mu\text{m}$ . (c) Liquid droplet wetting in the Wenzel state on groove-microstructured electrode surface with  $w>300\ \mu\text{m}$ . The contact area between liquid droplet and electrode surface can be described as follows:  $S_{III}>S_I>S_{II}$ .

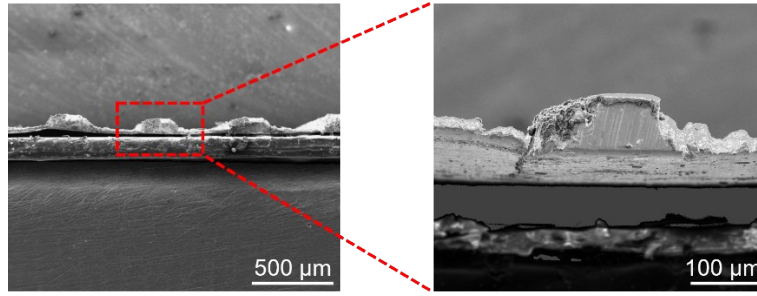

**Fig. S13** Cross-sectional SEM images of groove-microstructured electrode ( $w=400\ \mu\text{m}$ ).

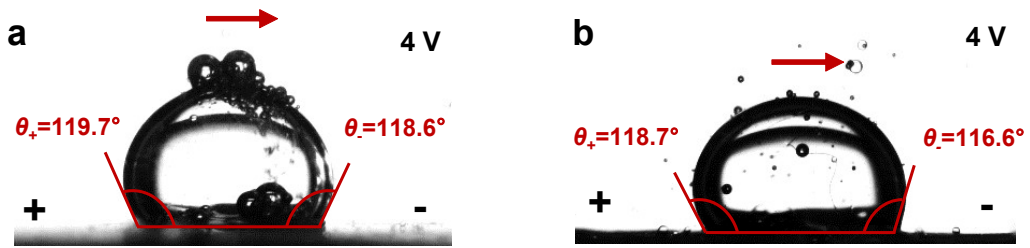

**Fig. S14** Liquid droplet contact angle on (a) flat and (b) groove-microstructured electrode surface during directional liquid droplet (10  $\mu\text{L}$ ) motion at critical voltage (4 V) under the unbalanced force.  $F_{E,c}$  activated on both ends of the liquid droplet, as calculated by equation

(4) :

$$F_{E, c} = \int_s^L \gamma_{ow} (\cos \theta_+ - \cos \theta_-) dl \quad (4)$$

where  $\theta_+$  and  $\theta_-$  are the CAs of liquid droplet under electric field on the anode and cathode surfaces, respectively.  $\gamma_{ow}$  is the interfacial tension between the oil and the water, and  $dl$  is the corresponding length of the liquid droplet on electrode surface. The calculated results indicate that groove microstructure facilitates liquid droplet motion.

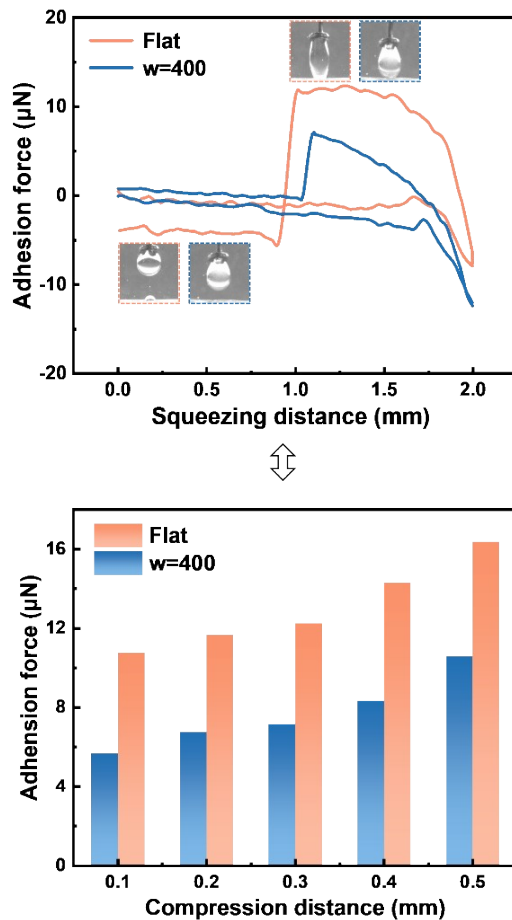

**Fig. S15** Adhesion force-distance charts of liquid droplet (2 µL) on flat and groove-microstructured electrode surface in oil, showing that groove-microstructure reduces the surface adhesion force.



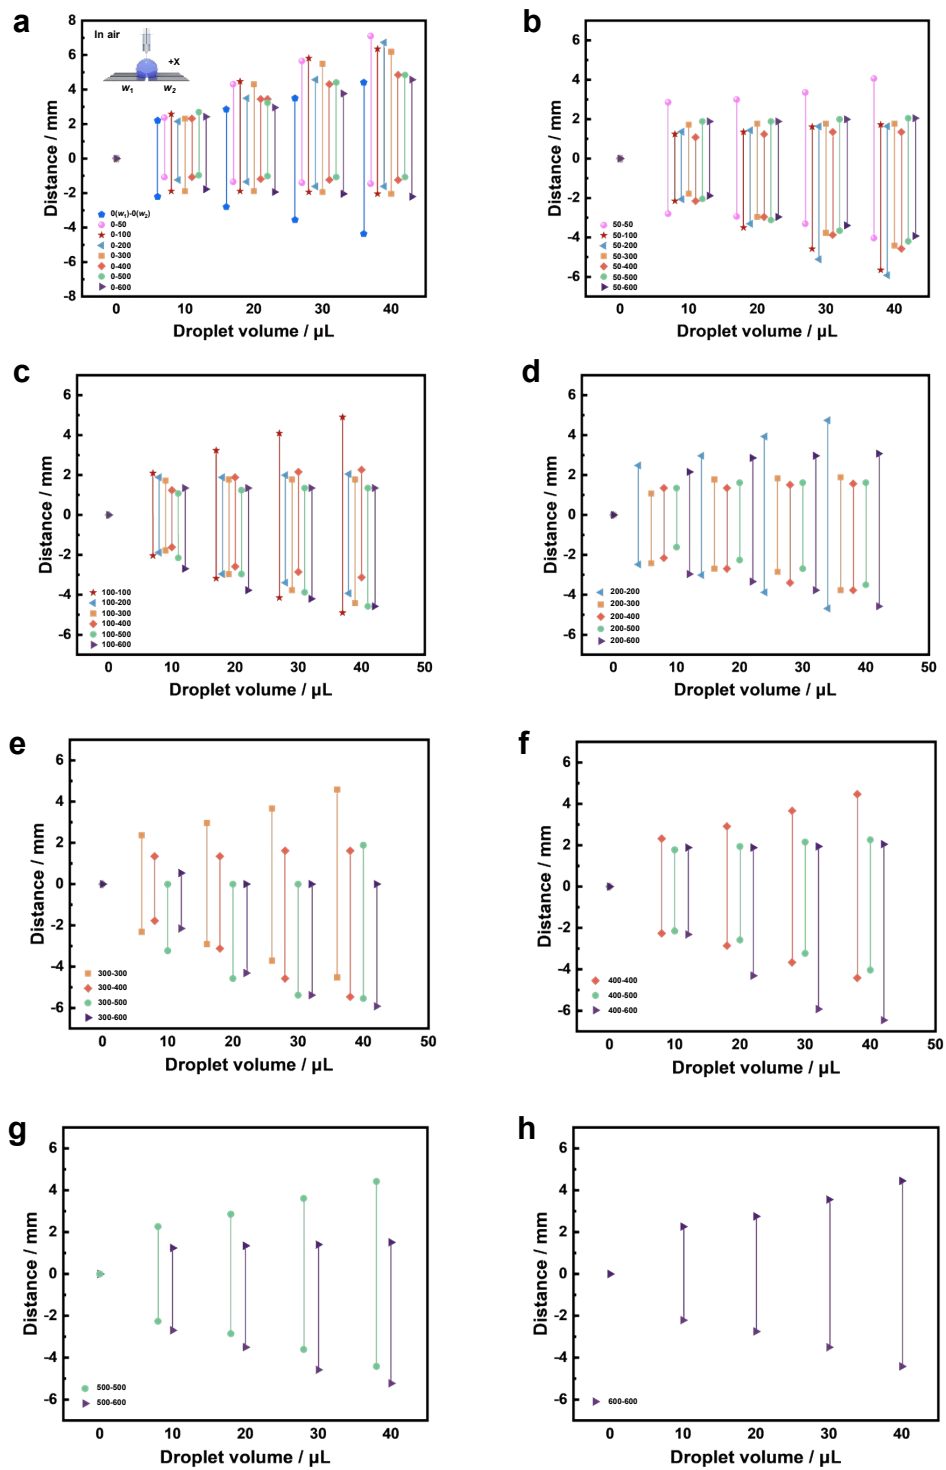

**Fig. S16** Liquid droplet wetting distance on combined electrode surface varies with groove width and volume in air. (a)  $w=0\sim 600\ \mu\text{m}$ , (b)  $w=50\sim 600\ \mu\text{m}$ , (c)  $w=100\sim 600\ \mu\text{m}$ , (d)  $w=200\sim 600\ \mu\text{m}$ , (e)  $w=300\sim 600\ \mu\text{m}$ , (f)  $w=400\sim 600\ \mu\text{m}$ , (g)  $w=500\sim 600\ \mu\text{m}$  and (h)  $w=600\ \mu\text{m}$ .

**Table S1** The effect of surface tension for liquid droplet with different compositions on the motion behavior.

| Composition             | Directional transport | Droplet splitting | Surface tension (mN/m) |
|-------------------------|-----------------------|-------------------|------------------------|
| Deionized water         | ×                     | ×                 | 72.56                  |
| 0.1 M PBS               | √                     | ×                 | 68.21                  |
| 0.1 M NaCl              | √                     | ×                 | 67.95                  |
| 0.1 M PBS+0.001 M DBAE  | √                     | ×                 | 58.87                  |
| 0.1 M NaCl+0.001 M DBAE | √                     | ×                 | 58.30                  |
| 0.1 M PBS+0.005 M DBAE  | √                     | ×                 | 54.44                  |
| 0.1 M NaCl+0.005 M DBAE | √                     | ×                 | 54.28                  |
| 0.1 M PBS+0.01 M DBAE   | √                     | ×                 | 50.39                  |
| 0.1 M NaCl+0.01 M DBAE  | √                     | ×                 | 49.64                  |
| 0.1 M PBS+0.05 M DBAE   | √                     | √                 | 42.44                  |
| 0.1 M NaCl+0.05 M DBAE  | √                     | √                 | 42.20                  |
| 0.1 M PBS+0.1 M DBAE    | √                     | √                 | 38.67                  |
| 0.1 M NaCl+0.1 M DBAE   | √                     | √                 | 38.42                  |
| 0.1 M PBS+0.2 M DBAE    | √                     | √                 | 34.77                  |
| 0.1 M NaCl+0.2 M DBAE   | √                     | √                 | 34.12                  |

## **Supplemental Movies**

**Movie S1** Droplet motion comparison on electrode surface at the voltage of 4 V and 10 V.

**Movie S2** Droplet splitting comparison on flat and groove-microstructured electrode surface at the voltage of 30 V and volume of 40  $\mu\text{L}$ .
